# Supplementary material
Source: PubMed Central journal article supplement (PMC9909570)
Supplement: jamadermatol-e226325-s001.pdf [file jamadermatol-e226325-s001.pdf]

## Supplementary Online Content

Schneeweiss MC, Savage TJ, Wyss R, et al. Risk of infection in children with psoriasis receiving treatment with ustekinumab, etanercept, or methotrexate before and after labeling expansion. *JAMA Dermatol*. Published online February 8, 2023. doi:10.1001/jamadermatol.2022.6325

**eFigure.** Study Design Diagram

**eTable 1.** Inpatient Infections Included in Analysis

**eTable 2.** Outpatient Infections Included in Analysis

**eTable 3.** Pediatric Comorbidity Score

**eTable 4.** Pooled CONSORT Table

**eTable 5.** Pooled Patient Characteristics With Standardized Differences for Ustekinumab vs Etanercept, Before and After Propensity-Score Matching

**eTable 6.** Pooled Incidence Rate and Rate Ratio of Infections (2009-2021), Unadjusted

**eTable 7.** Pooled Incidence Rate of Serious Infections Stratified by Years, After PS-Decile Stratification

**eReferences**

This supplementary material has been provided by the authors to give readers additional information about their work.

eFigure. Study Design Diagram<sup>1</sup>

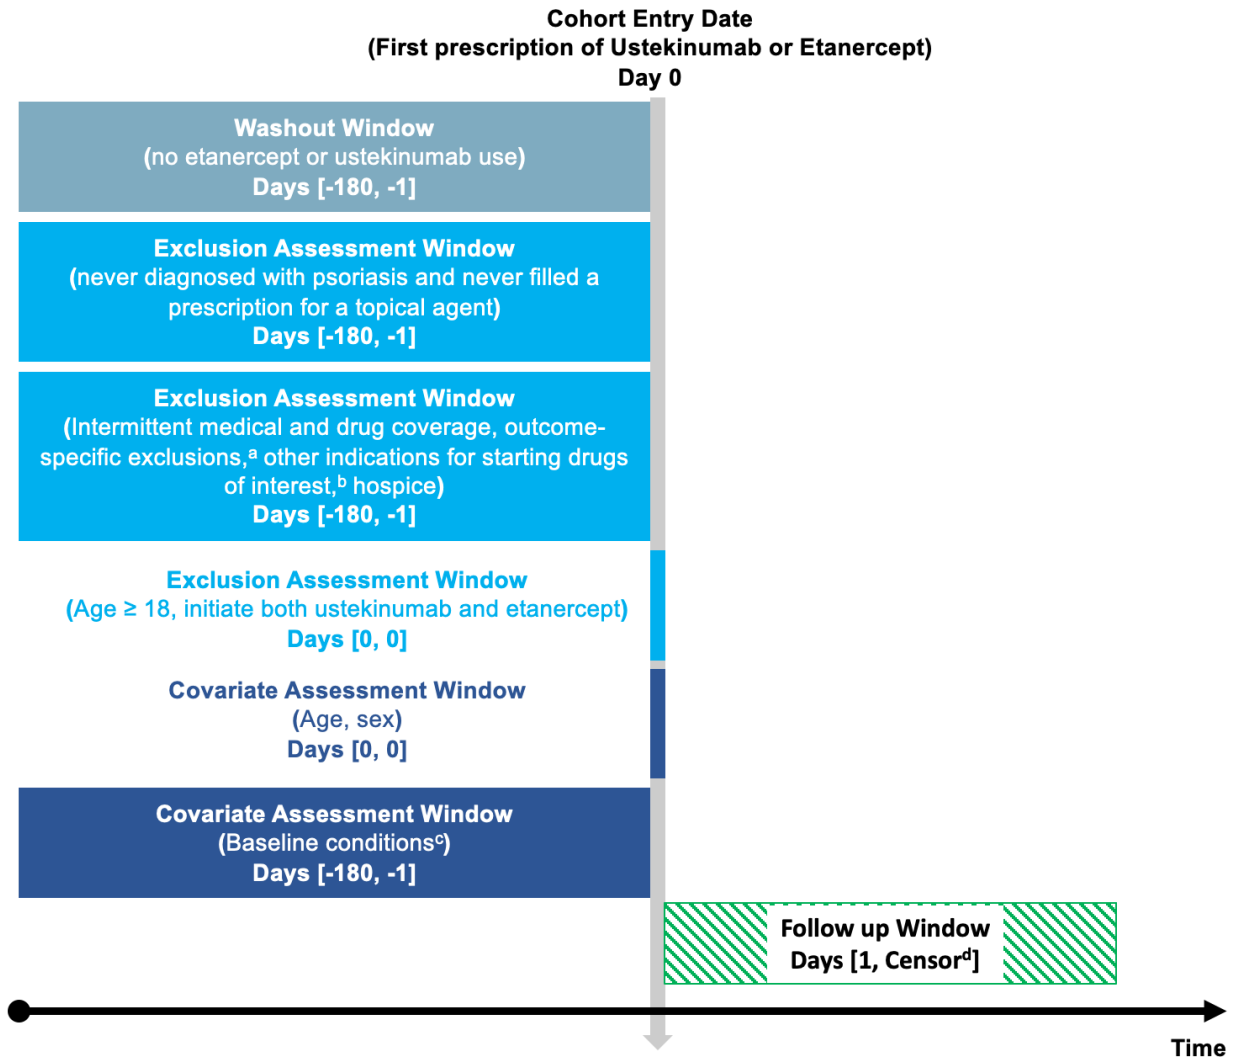

<sup>a</sup> Outcome specific exclusions: use of non-dermatologic systemic immunomodulating agents (rituximab, tocilizumab, anakinra, cyclophosphamide, mercaptopurine, baricitinib, upadacitinib, tofacitinib, vedolizumab), malignancy except non-melanoma skin cancer, chemotherapy, organ transplant, HIV/AIDS diagnosis or medication use, congenital immune deficiency, cystic fibrosis, chronic infection, hospice.

<sup>b</sup> Other indications for starting methotrexate, ustekinumab or etanercept: ankylosing spondylitis, inflammatory bowel disease, dermatomyositis, rheumatoid arthritis or juvenile idiopathic arthritis.

<sup>c</sup> Baseline conditions included: race, history of past infections that required an office visit or hospitalization, prior use of antibiotic/antifungal/antiviral medication, history of surgery, number of prior and recent non-biologic or biologic immunomodulatory agents, systemic glucocorticoid use, cumulative dose of systemic glucocorticoids in prednisone mg equivalences, and healthcare utilization, i.e., number of outpatient physician visits, number of unique medications, number of dermatologist visits.

<sup>d</sup> Earliest of: outcome of interest (infection), death, disenrollment, 180 days of follow-up, end of the study period

**eTable 1.** Inpatient Infections Included in Analysis

| Outcome                                            | Diagnosis                                                               |
|----------------------------------------------------|-------------------------------------------------------------------------|
| <b>Inpatient or emergency department infection</b> |                                                                         |
| <b>Serious bacterial</b>                           | Cellulitis and abscess                                                  |
|                                                    | necrotizing fasciitis                                                   |
|                                                    | skin and soft tissue infection                                          |
|                                                    | septicemia or bacteremia                                                |
|                                                    | bacterial pneumonia                                                     |
|                                                    | osteomyelitis                                                           |
|                                                    | pyelonephritis                                                          |
|                                                    | bacterial meningitis                                                    |
|                                                    | bacterial encephalitis                                                  |
|                                                    | Endocarditis                                                            |
|                                                    | septic arthritis                                                        |
|                                                    | Endocarditis                                                            |
|                                                    | bacterial pneumonia (incl. Legionella) or pyothorax                     |
|                                                    | Pyelonephritis or UTI                                                   |
|                                                    | Septic arthritis                                                        |
|                                                    | Osteomyelitis, acute                                                    |
|                                                    | Bacteremia or septicemia or toxic shock syndrome                        |
|                                                    | Pharyngeal abscess (peritonsillar, retropharyngeal, and parapharyngeal) |
|                                                    | Pyothorax                                                               |
|                                                    | Mastoiditis                                                             |
| Pyomyositis                                        |                                                                         |
| Acute rheumatic fever                              |                                                                         |
| Clostridioides difficile                           |                                                                         |
| Sinusitis, acute                                   |                                                                         |
| <b>Opportunistic</b>                               | pneumocystis jiroveci pneumonia                                         |
|                                                    | EBV                                                                     |
|                                                    | CMV                                                                     |
|                                                    | Aspergillus                                                             |
|                                                    | Candidiasis                                                             |
|                                                    | Mucormycosis                                                            |
|                                                    | Mycobacterium tuberculosis (any site)                                   |
|                                                    | Mycobacterium abscessus                                                 |
|                                                    | Mycobacterium avium intracellular complex                               |
|                                                    | Mycobacterium chelonae                                                  |
|                                                    | Mycobacterium fortuitum                                                 |
|                                                    | Mycobacterium kansasii                                                  |
|                                                    | Mycobacterium marinum                                                   |
|                                                    | cryptococcus                                                            |
|                                                    | histoplasmosis                                                          |

**Opportunistic cont.**

Blastomycosis  
Coccidioidomycosis  
Paracoccidioidomycosis  
Toxoplasma  
Nocardia  
Actinomyces  
Listeria

**Viral**

Viral Pneumonia, incl COVID  
RSV  
Influenza  
Herpes simplex virus  
Herpes zoster virus  
Encephalitis, viral  
Meningitis, viral  
West Nile virus

---

**eTable 2.** Outpatient Infections Included in Analysis

| <b>Outcome</b>                     | <b>Diagnosis</b>                                                                                                                                                                                                                                                                                                                                                                                                                                                                                                             |
|------------------------------------|------------------------------------------------------------------------------------------------------------------------------------------------------------------------------------------------------------------------------------------------------------------------------------------------------------------------------------------------------------------------------------------------------------------------------------------------------------------------------------------------------------------------------|
| <b>Outpatient infection</b>        |                                                                                                                                                                                                                                                                                                                                                                                                                                                                                                                              |
| Bacterial                          | Skin and soft tissue infection<br>Streptococcal pharyngitis and tonsillitis<br>Pneumonia<br>Otitis media, acute<br>Otitis externa, acute<br>Urinary tract infection<br>Bone and joint infection<br>Sinusitis, acute                                                                                                                                                                                                                                                                                                          |
| Mycobacterial infection            | Mycobacterium tuberculosis (any site)<br>Mycobacterium abscessus<br>Mycobacterium avium intracellular complex<br>Mycobacterium chelonae<br>Mycobacterium fortuitum<br>Mycobacterium kansasii<br>Mycobacterium marinum                                                                                                                                                                                                                                                                                                        |
| Viral                              | Herpes simplex virus<br>Herpes zoster virus                                                                                                                                                                                                                                                                                                                                                                                                                                                                                  |
| <b>Treatment class</b>             |                                                                                                                                                                                                                                                                                                                                                                                                                                                                                                                              |
| Antibiotics                        | Trimethoprim-sulfamethoxazole, doxycycline, minocycline, linezolid, dicloxacillin, penicillin, amoxicillin, amoxicillin-clavulanate, delafloxacin, ciprofloxacin, moxifloxacin, levofloxacin, delafloxacin, cephalexin, cefadroxil, cefdinir, cefpodoxime, cefuroxime, cefixime, ceftibuten, clindamycin, azithromycin, clarithromycin, metronidazole, nitrofurantoin, fosfomycin, acetic acid otic solution, ciprofloxacin and dexamethasone otic solution (Ciprodex), ciprofloxacin otic solution, ofloxacin otic solution |
| Mycobacterium-specific antibiotics | Isoniazid, rifampin, rifabutin, rifapentin, pyrazinamide, ethambutol, bedaquiline, levofloxacin, moxifloxacin, linezolid, azithromycin                                                                                                                                                                                                                                                                                                                                                                                       |
| Antivirals                         | aciclovir, valacyclovir, famciclovir                                                                                                                                                                                                                                                                                                                                                                                                                                                                                         |

**eTable 3.** Pediatric Comorbidity Score\* 2

| <b>Component</b>               | <b>Weight</b> |
|--------------------------------|---------------|
| Alcohol abuse                  | 1             |
| Anemia                         | 2             |
| Anxiety                        | 1             |
| Any malignancy                 | 5             |
| Asthma                         | 1             |
| Chromosomal abnormalities      | 2             |
| Cardiovascular abnormalities   | 2             |
| Conduct disorder               | 1             |
| Congenital malformations       | 2             |
| Depression                     | 4             |
| Developmental delays           | 1             |
| Diabetes                       | 4             |
| Drug abuse                     | 3             |
| Eating disorder                | 1             |
| <b>Epilepsy or convulsions</b> | 4             |
| Gastrointestinal conditions    | 1             |
| Joint disorders                | 1             |
| Menstrual disorders            | 2             |
| Nausea vomiting                | 1             |
| Pain Conditions                | 1             |
| <b>Psychotic disorders</b>     | 3             |
| Sleep disorder                 | 1             |
| Smoking                        | 2             |
| Weight loss                    | 2             |

\* Scores range from 0 to 5, with 0 being the lowest risk of hospitalization and 5 being the highest risk of hospitalization

**eTable 4. Pooled CONSORT Table**

| Inclusion and Exclusion criteria                                                            | Ustekinumab (exposure) vs. etanercept (referent) |                    | Ustekinumab (exposure) vs. methotrexate (referent) |                    | Etanercept (exposure) vs. methotrexate (referent) |                    |
|---------------------------------------------------------------------------------------------|--------------------------------------------------|--------------------|----------------------------------------------------|--------------------|---------------------------------------------------|--------------------|
|                                                                                             | Excluded                                         | Remaining          | Excluded                                           | Remaining          | Excluded                                          | Remaining          |
| Patients in MarketScan and Optum                                                            |                                                  | <b>584,525,414</b> |                                                    | <b>584,525,414</b> |                                                   | <b>584,525,414</b> |
| Excluded due to age >= 18                                                                   | -351,851,914                                     |                    | -351,851,914                                       |                    | -351,851,914                                      |                    |
| Excluded due to insufficient enrollment                                                     | -77,064,674                                      |                    | -77,064,674                                        |                    | -77,064,674                                       |                    |
| Pediatric cohort: Total                                                                     |                                                  | <b>155,608,826</b> |                                                    | <b>155,608,826</b> |                                                   | <b>155,608,826</b> |
| Did not meet cohort entry criteria, <i>i.e.</i> , did not start a drug of interest          | -155,592,351                                     |                    | -155,560,442                                       |                    | -155,556,686                                      |                    |
| Insufficient enrollment (180 days) <sup>a</sup>                                             | -4,297                                           |                    | -13,243                                            |                    | -15,097                                           |                    |
| Prior use of referent                                                                       | -1,941                                           |                    | -5,362                                             |                    | -5,187                                            |                    |
| Prior use of exposure                                                                       | -201                                             |                    | -202                                               |                    | -1,765                                            |                    |
| Patient qualified in >1 exposure category                                                   | 0                                                |                    | 0                                                  |                    | -40                                               |                    |
| Age >= 18 <sup>b</sup>                                                                      | -4,788                                           |                    | -10,520                                            |                    | -9,952                                            |                    |
| Did not have a physician-recorded diagnosis of psoriasis <sup>c</sup>                       | -3,723                                           |                    | -16,929                                            |                    | -17,866                                           |                    |
| Did not fill a prescription for a topical agent <sup>d</sup>                                | -160                                             |                    | -216                                               |                    | -241                                              |                    |
| Comorbid conditions that have an indication for starting the drugs of interest <sup>e</sup> | -149                                             |                    | -245                                               |                    | -245                                              |                    |
| Used a non-derm related systemic immunomodulatory agent <sup>f</sup>                        | -7                                               |                    | -17                                                |                    | -17                                               |                    |
| Comorbid malignant neoplasm or chemotherapy procedure                                       | -10                                              |                    | -23                                                |                    | -17                                               |                    |
| Organ transplant <sup>g</sup>                                                               | 0                                                |                    | 0                                                  |                    | 0                                                 |                    |
| Comorbid HIV/AIDS (diagnosis or medication)                                                 | 0                                                |                    | -1                                                 |                    | -1                                                |                    |
| Comorbid congenital immunodeficiency                                                        | -1                                               |                    | -5                                                 |                    | -4                                                |                    |
| Hospice                                                                                     | -11                                              |                    | -12                                                |                    | -10                                               |                    |
| Comorbid cystic fibrosis                                                                    | 0                                                |                    | 0                                                  |                    | 0                                                 |                    |
| Chronic infection                                                                           | -6                                               |                    | -11                                                |                    | -11                                               |                    |
| Dropped as incomplete case or did not begin follow-up                                       | -1                                               |                    | -3                                                 |                    | -3                                                |                    |
| Total children meeting criteria in each pair-wise comparison                                |                                                  | <b>1,180</b>       |                                                    | <b>1,595</b>       |                                                   | <b>1,725</b>       |
| After trimming <sup>h</sup> - total children meeting criteria in each pair-wise comparison  | -22                                              | <b>1,158</b>       | -21                                                | <b>1,574</b>       | -28                                               | <b>1,697</b>       |

<sup>a</sup> Patients were excluded if they did not have continuous enrollment in their healthplan during the 180 days before initiating the systemic immunomodulatory agent.

<sup>b</sup> While we start with a pediatric cohort, some children and adolescents may have aged 18 years or older by the time they meet our cohort entry criteria, i.e., start ustekinumab, etanercept or methotrexate.

<sup>c</sup> We excluded patients who did not have a physician-recorded diagnosis of psoriasis, within 180 days prior to starting drug.

<sup>d</sup> We further excluded patients who did fill a prescription for either a topical corticosteroid or topical vitamin D derivative, within 180 days prior to starting drug.

<sup>e</sup> Co-occurring conditions that have an indication for starting the drugs of interest, included ankylosing spondylitis, rheumatoid arthritis or juvenile idiopathic arthritis, dermatomyositis, Crohn's disease or ulcerative colitis.

<sup>f</sup> Organ transplant (other than corneal), including bone marrow transplant.

<sup>g</sup> Use of non-dermatologic systemic immunomodulating agents, included rituximab, tocilizumab, anakinra, cyclophosphamide, mercaptopurine, baricitinib, upadacitinib, tofacitinib, vedolizumab.

<sup>h</sup> We conducted PS-decile stratification with symmetric trimming of the extremes of the PS distribution by 2.5%. This is the cohort count after conducting symmetric trimming.



**eTable 5.** Pooled Patient Characteristics With Standardized Differences for Ustekinumab vs Etanercept, Before and After Propensity-Score Matching

| Patient Characteristics                                         | Unadjusted   |             | Standardized difference | Adjusted by PS-matching |             | Standardized difference |
|-----------------------------------------------------------------|--------------|-------------|-------------------------|-------------------------|-------------|-------------------------|
|                                                                 | Ustekinumab* | Etanercept  |                         | Ustekinumab*            | etanercept  |                         |
| Number of patients                                              | 394          | 786         | --                      | 206                     | 206         | --                      |
| <b>Demographics, n (%)</b>                                      |              |             |                         |                         |             |                         |
| Sex                                                             |              |             |                         |                         |             |                         |
| ...Male                                                         | 162 (41.1%)  | 312 (39.7%) | 0.03                    | 78 (37.9%)              | 81 (39.3%)  | -0.03                   |
| ...Female                                                       | 232 (58.9%)  | 474 (60.3%) | -0.03                   | 128 (62.1%)             | 125 (60.7%) | 0.03                    |
| Age categories (years)                                          |              |             |                         |                         |             |                         |
| ...0-5                                                          | 1 (0.3%)     | 14 (1.8%)   | -0.15                   | 0 (0.0%)                | 0 (0.0%)    | -                       |
| ...6 – 11                                                       | 16 (4.1%)    | 187 (23.8%) | -0.59                   | 13 (6.3%)               | 13 (6.3%)   | 0.00                    |
| ...12-17                                                        | 377 (95.7%)  | 585 (74.4%) | 0.62                    | 193 (93.7%)             | 193 (93.7%) | 0.00                    |
| <b>Healthcare utilization</b>                                   |              |             |                         |                         |             |                         |
| Number of office visit (180 days); mean (sd)                    | 5.87 (6.66)  | 6.82 (6.58) | -0.14                   | 6.21 (7.08)             | 6.14 (6.02) | 0.01                    |
| Number of unique medications, topical (180 days); mean (sd)     | 2.49 (2.45)  | 2.87 (2.77) | -0.14                   | 2.54 (2.59)             | 2.58 (2.27) | -0.01                   |
| Number of unique medications, non-topical (180 days); mean (sd) | 3.87 (4.53)  | 4.26 (4.84) | -0.08                   | 3.61 (4.52)             | 3.10 (3.61) | 0.12                    |
| Hospitalization; n (%)                                          | 11 (2.8%)    | 20 (2.5%)   | 0.02                    | 2 (1.0%)                | 2 (1.0%)    | 0.00                    |
| Number of dermatologist visits, (180 days); mean (sd)           | 2.18 (3.43)  | 2.85 (4.66) | -0.16                   | 2.41 (3.98)             | 2.51 (3.57) | -0.03                   |
| <b>Infection risk factors, n (%)</b>                            |              |             |                         |                         |             |                         |
| History of any invasive procedures or surgery                   | 1 (0.3%)     | 1 (0.1%)    | 0.03                    | 0 (0.0%)                | 0 (0.0%)    | -                       |
| Physician administered IV antifungal, antibiotic or antiviral   | 6 (1.5%)     | 22 (2.8%)   | -0.09                   | 2 (1.0%)                | 3 (1.5%)    | -0.04                   |
| Use of antibiotics, antivirals, antifungals, or TB medication   | 145 (36.8%)  | 319 (40.6%) | -0.08                   | 79 (38.3%)              | 74 (35.9%)  | 0.05                    |
| Prior infection – bacterial or viral (inpatient or outpatient)  | 62 (15.7%)   | 126 (16.0%) | -0.01                   | 27 (13.1%)              | 31 (15.0%)  | -0.06                   |
| Prior infection - opportunistic (inpatient or outpatient)       | 0 (0.0%)     | 5 (0.6%)    | -0.11                   | 0 (0.0%)                | 0 (0.0%)    | -                       |
| Type 1 diabetes                                                 | 1 (0.3%)     | 8 (1.0%)    | -0.10                   | 0 (0.0%)                | 0 (0.0%)    | -                       |
| Sickle cell disease                                             | 0 (0.0%)     | 0 (0.0%)    | -                       | 0 (0.0%)                | 0 (0.0%)    | -                       |
| Pediatric comorbidity score ...mean (sd)                        | 1.11 (2.15)  | 0.93 (1.69) | 0.09                    | 0.84 (1.75)             | 0.66 (1.27) | 0.12                    |
| <b>Comorbid conditions; n (%)</b>                               |              |             |                         |                         |             |                         |
| Acne                                                            | 59 (15.0%)   | 70 (8.9%)   | 0.19                    | 29 (14.1%)              | 26 (12.6%)  | 0.04                    |
| Hidradenitis suppurativa                                        | 2 (0.5%)     | 1 (0.1%)    | 0.07                    | 0 (0.0%)                | 0 (0.0%)    | -                       |
| Psoriatic arthritis                                             | 18 (4.6%)    | 124 (15.8%) | -0.38                   | 15 (7.3%)               | 8 (3.9%)    | 0.15                    |
| Uveitis                                                         | 0 (0.0%)     | 0 (0.0%)    | -                       | 0 (0.0%)                | 0 (0.0%)    | -                       |

| eTable 5 continued                                                                          | Ustekinumab<br>(n=394) | Etanercept<br>(n=786) | Unadjusted<br>Standardized<br>difference | Ustekinumab<br>(n=206) | Etanercept<br>(n=206) | Adjusted<br>Standardized<br>difference |
|---------------------------------------------------------------------------------------------|------------------------|-----------------------|------------------------------------------|------------------------|-----------------------|----------------------------------------|
| <b>Systemic steroid use; n (%)</b>                                                          |                        |                       |                                          |                        |                       |                                        |
| Prior use of Glucocorticoids (systemic)                                                     | 39 (9.9%)              | 99 (12.6%)            | -0.09                                    | 20 (9.7%)              | 14 (6.8%)             | 0.11                                   |
| Cumulative sum of daily dose of oral steroids, in oral prednisone mg equivalents, mean (sd) | 15.58 (85.46)          | 13.53 (88.42)         | 0.02                                     | 18.13 (96.58)          | 8.67 (51.09)          | 0.12                                   |
| <b>Prior use of immunomodulatory treatments, n (%)<sup>a</sup></b>                          |                        |                       |                                          |                        |                       |                                        |
| Use of prior non-biologic <sup>b</sup> immunomodulators [-30, -1]                           | 23 (5.8%)              | 94 (12.0%)            | -0.22                                    | 15 (7.3%)              | 14 (6.8%)             | 0.02                                   |
| Use of prior non-biologic immunomodulators [-60, -31]                                       | 30 (7.6%)              | 107 (13.6%)           | -0.20                                    | 17 (8.3%)              | 14 (6.8%)             | 0.06                                   |
| Use of prior biologic <sup>c</sup> immunomodulators [-30, -1]                               | 16 (4.1%)              | 13 (1.7%)             | 0.14                                     | 2 (1.0%)               | 1 (0.5%)              | 0.06                                   |
| Use of prior biologic immunomodulators [-60, -31]                                           | 35 (8.9%)              | 12 (1.5%)             | 0.34                                     | 5 (2.4%)               | 2 (1.0%)              | 0.11                                   |
| <b>Prior use of immunomodulatory treatments, n (%)<sup>a</sup></b>                          |                        |                       |                                          |                        |                       |                                        |
| Number of prior non-biologic immunomodulators                                               |                        |                       |                                          |                        |                       |                                        |
| ...0; n (%)                                                                                 | 337 (85.5%)            | 582 (74.0%)           | 0.29                                     | 172 (83.5%)            | 175 (85.0%)           | -0.04                                  |
| ...1; n (%)                                                                                 | 56 (14.2%)             | 197 (25.1%)           | -0.28                                    | 34 (16.5%)             | 31 (15.0%)            | 0.04                                   |
| ...2+; n (%)                                                                                | 1 (0.3%)               | 7 (0.9%)              | -0.08                                    | 0 (0.0%)               | 0 (0.0%)              | -                                      |
| Number of prior biologic immunomodulators                                                   |                        |                       |                                          |                        |                       |                                        |
| ...0; n (%)                                                                                 | 335 (85.0%)            | 749 (95.3%)           | -0.35                                    | 192 (93.2%)            | 200 (97.1%)           | -0.18                                  |
| ...1; n (%)                                                                                 | 56 (14.2%)             | 37 (4.7%)             | 0.33                                     | 14 (6.8%)              | 6 (2.9%)              | 0.18                                   |
| ...2+; n (%)                                                                                | 3 (0.8%)               | 0 (0.0%)              | 0.12                                     | 0 (0.0%)               | 0 (0.0%)              | -                                      |

<sup>a</sup> Due to the new-user requirement we have excluded prior use of the referent drug and the drug of interest, i.e., patients were new-users (180-day washout) of both the referent agent, etanercept, and the exposure agent, ustekinumab.

<sup>b</sup> Non-biologics: methotrexate, cyclosporine, mycophenolate, leflunamide.

<sup>c</sup> Biologics: apremilast, risankizumab, tildrakizumab, guselkumab, brodalumab, golimumab, infliximab, certolizumab, adalimumab, ixekizumab, secukinumab.

**eTable 6.** Pooled Incidence Rate and Rate Ratio of Infections (2009-2021), Unadjusted

|                                                | Ustekinumab <sup>a</sup><br>vs. Etanercept |            | Ustekinumab <sup>a</sup><br>vs. Methotrexate |              | Etanercept<br>vs. Methotrexate |              |
|------------------------------------------------|--------------------------------------------|------------|----------------------------------------------|--------------|--------------------------------|--------------|
|                                                | Ustekinumab <sup>a</sup>                   | Etanercept | Ustekinumab <sup>a</sup>                     | Methotrexate | Etanercept                     | Methotrexate |
| <b>Serious infection</b>                       |                                            |            |                                              |              |                                |              |
| Number of patients                             | 394                                        | 786        | 406                                          | 1189         | 586                            | 1139         |
| Number of person-years                         | 170                                        | 354        | 178                                          | 539          | 264                            | 516          |
| Number of events                               | 3                                          | 9          | 3                                            | 8            | 9 (1.54%)                      | 8 (0.70%)    |
| Rate per 1000 person-years                     | 17.65                                      | 25.42      | 16.85                                        | 14.84        | 34.09                          | 15.50        |
| Rate Ratio (95% CI)                            | 0.69 (0.19, 2.56)                          | Referent   | 1.14 (0.30, 4.28)                            | Referent     | 2.20 (0.85, 5.70)              | Referent     |
| Rate Difference per 1000 person-years (95% CI) | -7.78 (-33.75, 18.20)                      | Referent   | 2.01 (-19.66, 23.68)                         | Referent     | 18.59 (-6.14, 43.32)           | Referent     |
| <b>Outpatient infection</b>                    |                                            |            |                                              |              |                                |              |
| Number of patients                             | 394                                        | 786        | 406                                          | 1189         | 586                            | 1139         |
| Number of person-years                         | 158                                        | 321        | 166                                          | 484          | 240                            | 463          |
| Number of events                               | 45                                         | 141        | 48                                           | 212          | 102                            | 202          |
| Rate per 1000 person-years                     | 284.81                                     | 439.25     | 289.16                                       | 438.02       | 425.00                         | 436.29       |
| Rate Ratio (95% CI)                            | 0.65 (0.46, 0.91)                          | Referent   | 0.66 (0.48, 0.90)                            | Referent     | 0.97 (0.77, 1.24)              | Referent     |
| Rate Difference per 1000 person-years (95% CI) | -154.44 (-264.81, -44.07)                  | Referent   | -148.86 (-249.70, -48.02)                    | Referent     | -11.29 (-113.38, 90.81)        | Referent     |

Abbreviations: *CI*, confidence interval; *PS*, propensity-score. <sup>a</sup> Included ustekinumab users who contributed to one or more pairwise comparisons. \*Serious infections were defined as infections requiring and emergency room visit or hospitalization.

**eTable 7.** Pooled Incidence Rate of Serious Infections Stratified by Years, After PS-Decile Stratification

|                                                | Ustekinumab <sup>a</sup><br>vs. Etanercept |            | Ustekinumab <sup>a</sup><br>vs. Methotrexate |              | Etanercept<br>vs. Methotrexate |              |
|------------------------------------------------|--------------------------------------------|------------|----------------------------------------------|--------------|--------------------------------|--------------|
|                                                | Ustekinumab <sup>a</sup>                   | Etanercept | Ustekinumab <sup>a</sup>                     | Methotrexate | Etanercept                     | Methotrexate |
| <b>Serious infection, 2009-2015</b>            |                                            |            |                                              |              |                                |              |
| Number of patients                             | 50                                         | 443        | 53                                           | 724          | 313                            | 685          |
| Number of person-years                         | 22                                         | 202        | 24                                           | 331          | 143                            | 312          |
| Number of events                               | 0                                          | 5          | 0                                            | 7            | 4                              | 7            |
| Rate per 1000 person-years                     | 0.00                                       | 24.75      | 0.00                                         | 21.15        | 27.97                          | 22.44        |
| Rate Ratio (95% CI)                            | n/a                                        | Referent   | n/a                                          | Referent     | 1.25 (1.02, 1.52)              | Referent     |
| Rate Difference per 1000 person-years (95% CI) | -24.75 (0.00, 0.00)                        | Referent   | -21.15 (0.00, 0.00)                          | Referent     | 5.54 (0.00, 0.00)              | Referent     |
| <b>Serious infection, 2016-2021</b>            |                                            |            |                                              |              |                                |              |
| Number of patients                             | 329                                        | 336        | 341                                          | 456          | 358                            | 636          |
| Number of person-years                         | 141                                        | 150        | 147                                          | 205          | 158                            | 284          |
| Number of events                               | 3                                          | 4          | 3                                            | 1            | 8                              | 2            |
| Rate per 1000 person-years                     | 21.28                                      | 26.67      | 20.41                                        | 4.89         | 50.63                          | 7.04         |
| Rate Ratio (95% CI)                            | 0.80 (0.63, 1.00)                          | Referent   | 4.18 (3.39, 5.17)                            | Referent     | 7.19 (5.92, 8.73)              | Referent     |
| Rate Difference per 1000 person-years (95% CI) | -5.39 (0.00, 0.00)                         | Referent   | 15.53 (0.00, 0.00)                           | Referent     | 43.59 (0.00, 0.00)             | Referent     |

*Abbreviations:* *CI*, confidence interval; *PS*, propensity-score. <sup>a</sup> Included ustekinumab users who contributed to one or more pairwise comparisons. \*Serious infections were defined as infections requiring and emergency room visit or hospitalization.

## eReferences

1. Schneeweiss S, Rassen JA, Brown JS, et al. Graphical Depiction of Longitudinal Study Designs in Health Care Databases. *Ann Intern Med.* 2019;170(6):398-406.
2. Sun JW, Bourgeois FT, Haneuse S, et al. Development and Validation of a Pediatric Comorbidity Index. *Am J Epidemiol.* 2021;190(5):918-927.
