# Supplementary material
Source: PubMed Central journal article supplement (PMC9909570)
Supplement: jamadermatol-e226325-s002.pdf [file jamadermatol-e226325-s002.pdf]

## Data Sharing Statement

Schneeweiss. Risk of Infection in Children With Psoriasis Receiving Treatment With Ustekinumab, Etanercept, or Methotrexate Before and After Labeling Expansion. *JAMA Dermatol*. Published February 08, 2023. doi:10.1001/jamadermatol.2022.6325

### Data

**Data available:** No

### Additional Information

**Explanation for why data not available:** Although data cannot be shared with third parties, reasonable requests for re-analysis of the data will be considered by the authors.
